# Supplementary material for: Effects of Litsea cubeba Essential Oil–Chitosan/Corn Starch Composite Films on the Quality and Shelf-Life of Strawberry (Fragaria × ananassa)
Source: MDPI journal article supplement (doi:10.3390/foods13040599), 2024-02-16
Supplement: s1 [file s1]

**Effects of *Litsea cubeba* Essential Oil–Chitosan/Corn Starch Composite Films on the Quality and Shelf-Life of Strawberry (*Fragaria* × *ananassa*)**

Hongjun Fu <sup>1,†</sup>, Liyuan Wang <sup>1,†</sup>, Jiahui Gu <sup>1</sup>, Xianglian Peng <sup>1,\*</sup> and Jian Zhao <sup>2,\*</sup>

<sup>1</sup> College of Food Science and Engineering, National Engineering Laboratory for Deep Process of Rice and Byproducts, Central South University of Forestry and Technology, Changsha 41004, China.

<sup>2</sup> Food Science and Technology, School of Chemical Engineering, UNSW Australia, Sydney 2052, Australia

<sup>†</sup> These authors contributed equally to this work

\* Correspondence: xianglianpeng@csuft.edu.cn (X.P.); jian.zhao@unsw.edu.au (J.Z.);

Tel.: +86-731-85623240 (X.P.); +61-2-9385-4304 (J.Z.)

**Table S1.** Effect of LCEO on mechanical properties of composite films

| LCEO (%) | Thickness (mm) | TS (MPa)                  | E (%)                    | WVP (mg H <sub>2</sub> O·m/h·m <sup>2</sup> ) | WS (%)                    |
|----------|----------------|---------------------------|--------------------------|-----------------------------------------------|---------------------------|
| 1.50     | 0.072±0.003    | 4.444±1.840 <sup>d</sup>  | 51.00±5.840 <sup>b</sup> | 0.723±0.023 <sup>d</sup>                      | 0.1288±0.002 <sup>e</sup> |
| 1.75     | 0.059±0.002    | 10.200±0.603 <sup>b</sup> | 44.44±2.210 <sup>b</sup> | 0.901±0.023 <sup>a</sup>                      | 0.1432±0.003 <sup>d</sup> |
| 2.00     | 0.062±0.010    | 10.645±2.138 <sup>b</sup> | 42.44±1.002 <sup>b</sup> | 0.523±0.008 <sup>b</sup>                      | 0.1585±0.002 <sup>d</sup> |
| 2.25     | 0.065±0.003    | 24.877±1.212 <sup>a</sup> | 67.88±1.692 <sup>a</sup> | 0.601±0.005 <sup>c</sup>                      | 0.2224±0.001 <sup>b</sup> |
| 2.50     | 0.063±0.007    | 13.762±0.611 <sup>b</sup> | 70.08±1.422 <sup>a</sup> | 0.723±0.019 <sup>d</sup>                      | 0.2521±0.001 <sup>a</sup> |
| 2.75     | 0.068±0.017    | 5.059±0.493 <sup>d</sup>  | 77.23±1.191 <sup>d</sup> | 0.401±0.027 <sup>a</sup>                      | 0.1820±0.007 <sup>c</sup> |
| 3.00     | 0.068±0.007    | 7.265±0.529 <sup>c</sup>  | 79.01±1.442 <sup>d</sup> | 0.423±0.018 <sup>a</sup>                      | 0.0553±0.004 <sup>f</sup> |

Notes: Values are means  $\pm$  standard deviations. a is the maximum or minimum average; b, c, d, e and f indicate significant difference ( $P<0.05$ ).

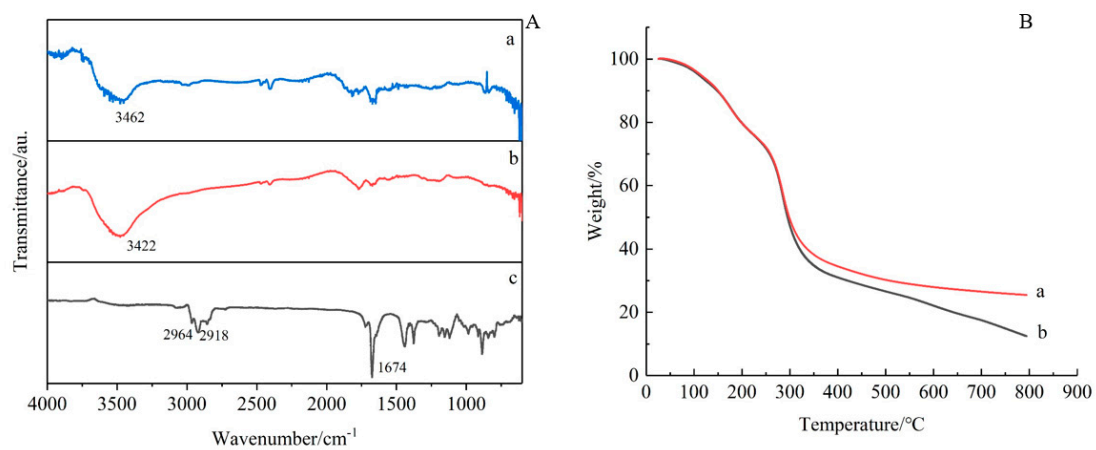

**Figure S1.** FTIR spectra (A) and TGA analysis (B) of the LCEO/CH/CS/gly film (a), CH/CS/gly film (b) and LCEO (c)
